# Supplementary material for: Elecampane (Inula helenium) Root Extract and Its Major Sesquiterpene Lactone, Alantolactone, Inhibit Adipogenesis of 3T3-L1 Preadipocytes
Source: MDPI journal article supplement (doi:10.3390/molecules27154765), 2022-07-25
Supplement: s1 [file s1 › molecules-1785808-supplementary revised .pdf]

## Supplemental Materials

**Table S1.** Sequence of the primers used for qPCR.

| Target gene <sup>1)</sup> | Primer sequence |                                 |
|---------------------------|-----------------|---------------------------------|
| Tbp                       | Sense           | 5'-GTGAAGGGTACAAGGGGGTG-3'      |
|                           | Antisense       | 5'-ACATCTCAGCAACCCACACA-3'      |
| Ppar $\gamma$             | Sense           | 5'-GGAGCCTAAGTTTGAGTTTGCTGTG-3' |
|                           | Antisense       | 5'-TGCAGCAGGTTGTCTTGGATG-3'     |
| Cebpa                     | Sense           | 5'-TTGAAGCACAATCGATCCATCC-3'    |
|                           | Antisense       | 5'-GCACACTGCCATTGCACAAG-3'      |
| Fabp4                     | Sense           | 5'-TGGGAACCTGGAAGCTTGTCTC-3'    |
|                           | Antisense       | 5'-GAATTCCACGCCCAGTTTGA-3'      |
| Fas                       | Sense           | 5'-AGCACTGCCTTCGGTTCAGTC-3'     |
|                           | Antisense       | 5'-AAGAGCTGTGGAGGCCACTTG-3'     |
| Scd-1                     | Sense           | 5'-CAGCCGAGCCTTGTAAGTTC-3'      |
|                           | Antisense       | 5'-GCTCTACACCTGCCTCTTCG-3'      |
| Acaca                     | Sense           | 5'-GAAGCCACAGTGAAATCTCG-3'      |
|                           | Antisense       | 5'-GATGGTTTGGCCTTTCACAT-3'      |
| Perilipin                 | Sense           | 5'-GATGAGAGCCATGACGACCAGA-3'    |
|                           | Antisense       | 5'-TGTGTACCACACCACCCAGGA-3'     |

<sup>1)</sup>Tbp; TATA-binding protein, Ppar $\gamma$ ; Peroxisome proliferator-activated receptor  $\gamma$ , C/ebpa; CCAT/enhancer binding protein alpha, Fabp4; Fatty acid binding protein 4, Fas; Fatty acid synthase, Acaca; Acetyl-CoA carboxylase alpha, Scd-1; Stearoyl-CoA desaturase-1.

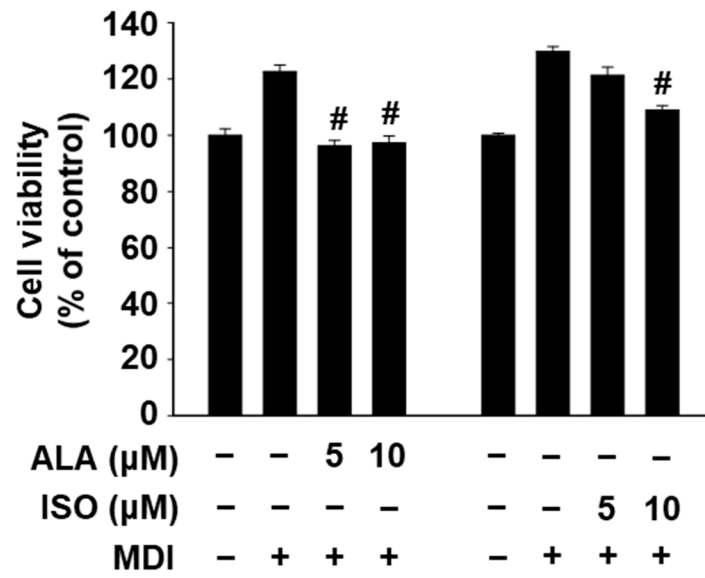

**Figure S1. Effect of ALA and ISO on cell viability in MDI-treated 3T3-L1 cells.** Cells were treated with ALA or ISO for 7 days in the presence of MDI, and cell viability was measured at 7 days by an MTT assay. The results are presented as means  $\pm$  SEM ( $n \geq 3$ ). <sup>#</sup> $P < 0.001$  vs. MDI alone.

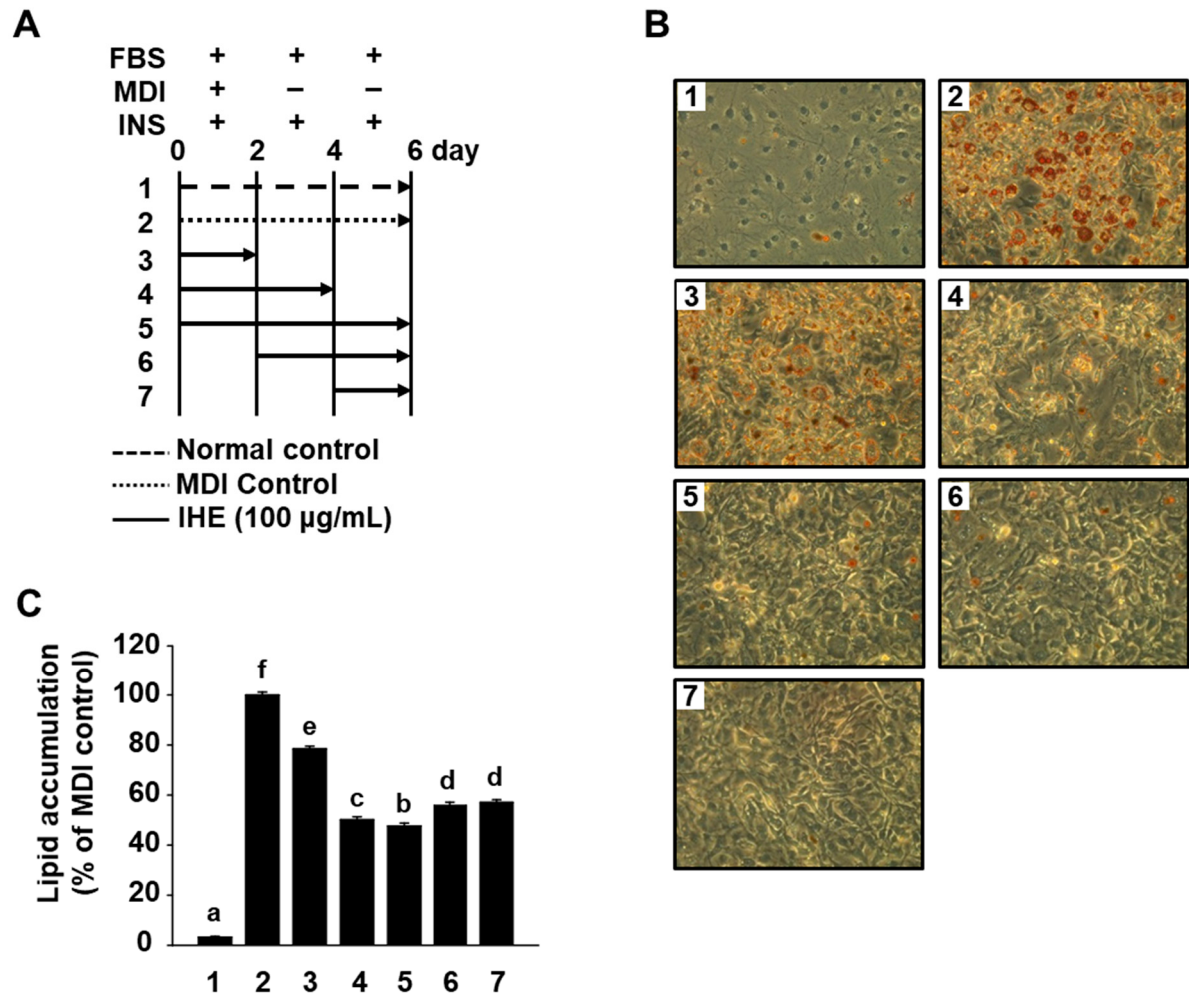

**Figure S2. Effect of IHE on different stages of adipogenic differentiation in MDI-treated 3T3-L1 cells.** A, Schematic model showing IHE treatment during adipogenic differentiation of 3T3-L1 cells. The arrows indicate the duration of IHE (100 µg/mL) treatment. B and C, Cells were stained with Oil Red O at 6 days after the induction of differentiation, and lipid accumulation was measured, as described in the Materials and Methods. The results are presented as means  $\pm$  SEM ( $n \geq 3$ ), and different letters are significantly different at  $P < 0.05$  by Duncan's multiple range test.

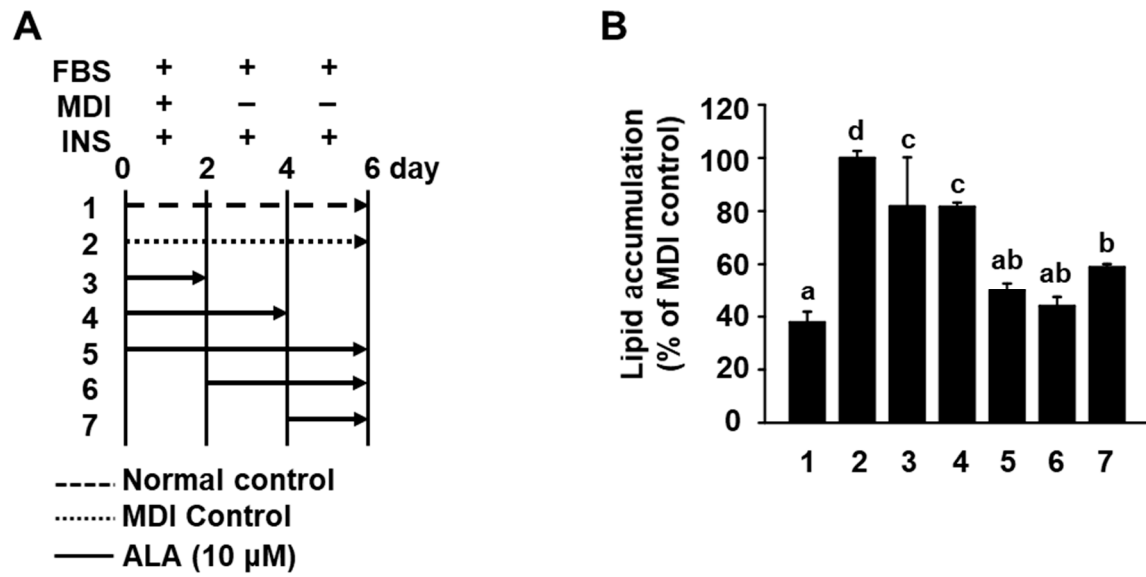

**Figure S3. Effect of ALA on different stages of adipogenic differentiation in MDI-treated 3T3-L1 cells.** A, Schematic model showing IHE treatment during adipogenic differentiation of 3T3-L1 cells. The arrows indicate the duration of ALA (10  $\mu$ M) treatment. B and C, Cells were stained with Oil Red O at 6 days after the induction of differentiation, and lipid accumulation was measured, as described in the Materials and Methods. The results are presented as means  $\pm$  SEM ( $n \geq 3$ ), and different letters are significantly different at  $P < 0.05$  by Duncan's multiple range test.
